# Supplementary material for: New insights about host response to smallpox using microarray data
Source: PubMed Central journal article supplement (PMC2077868; doi:10.1186/1752-0509-1-38), 2007-08-24
Supplement: 1752-0509-1-38-S3.pdf [file 1752-0509-1-38-S3.pdf]

ECM receptors + CAMs Day 0

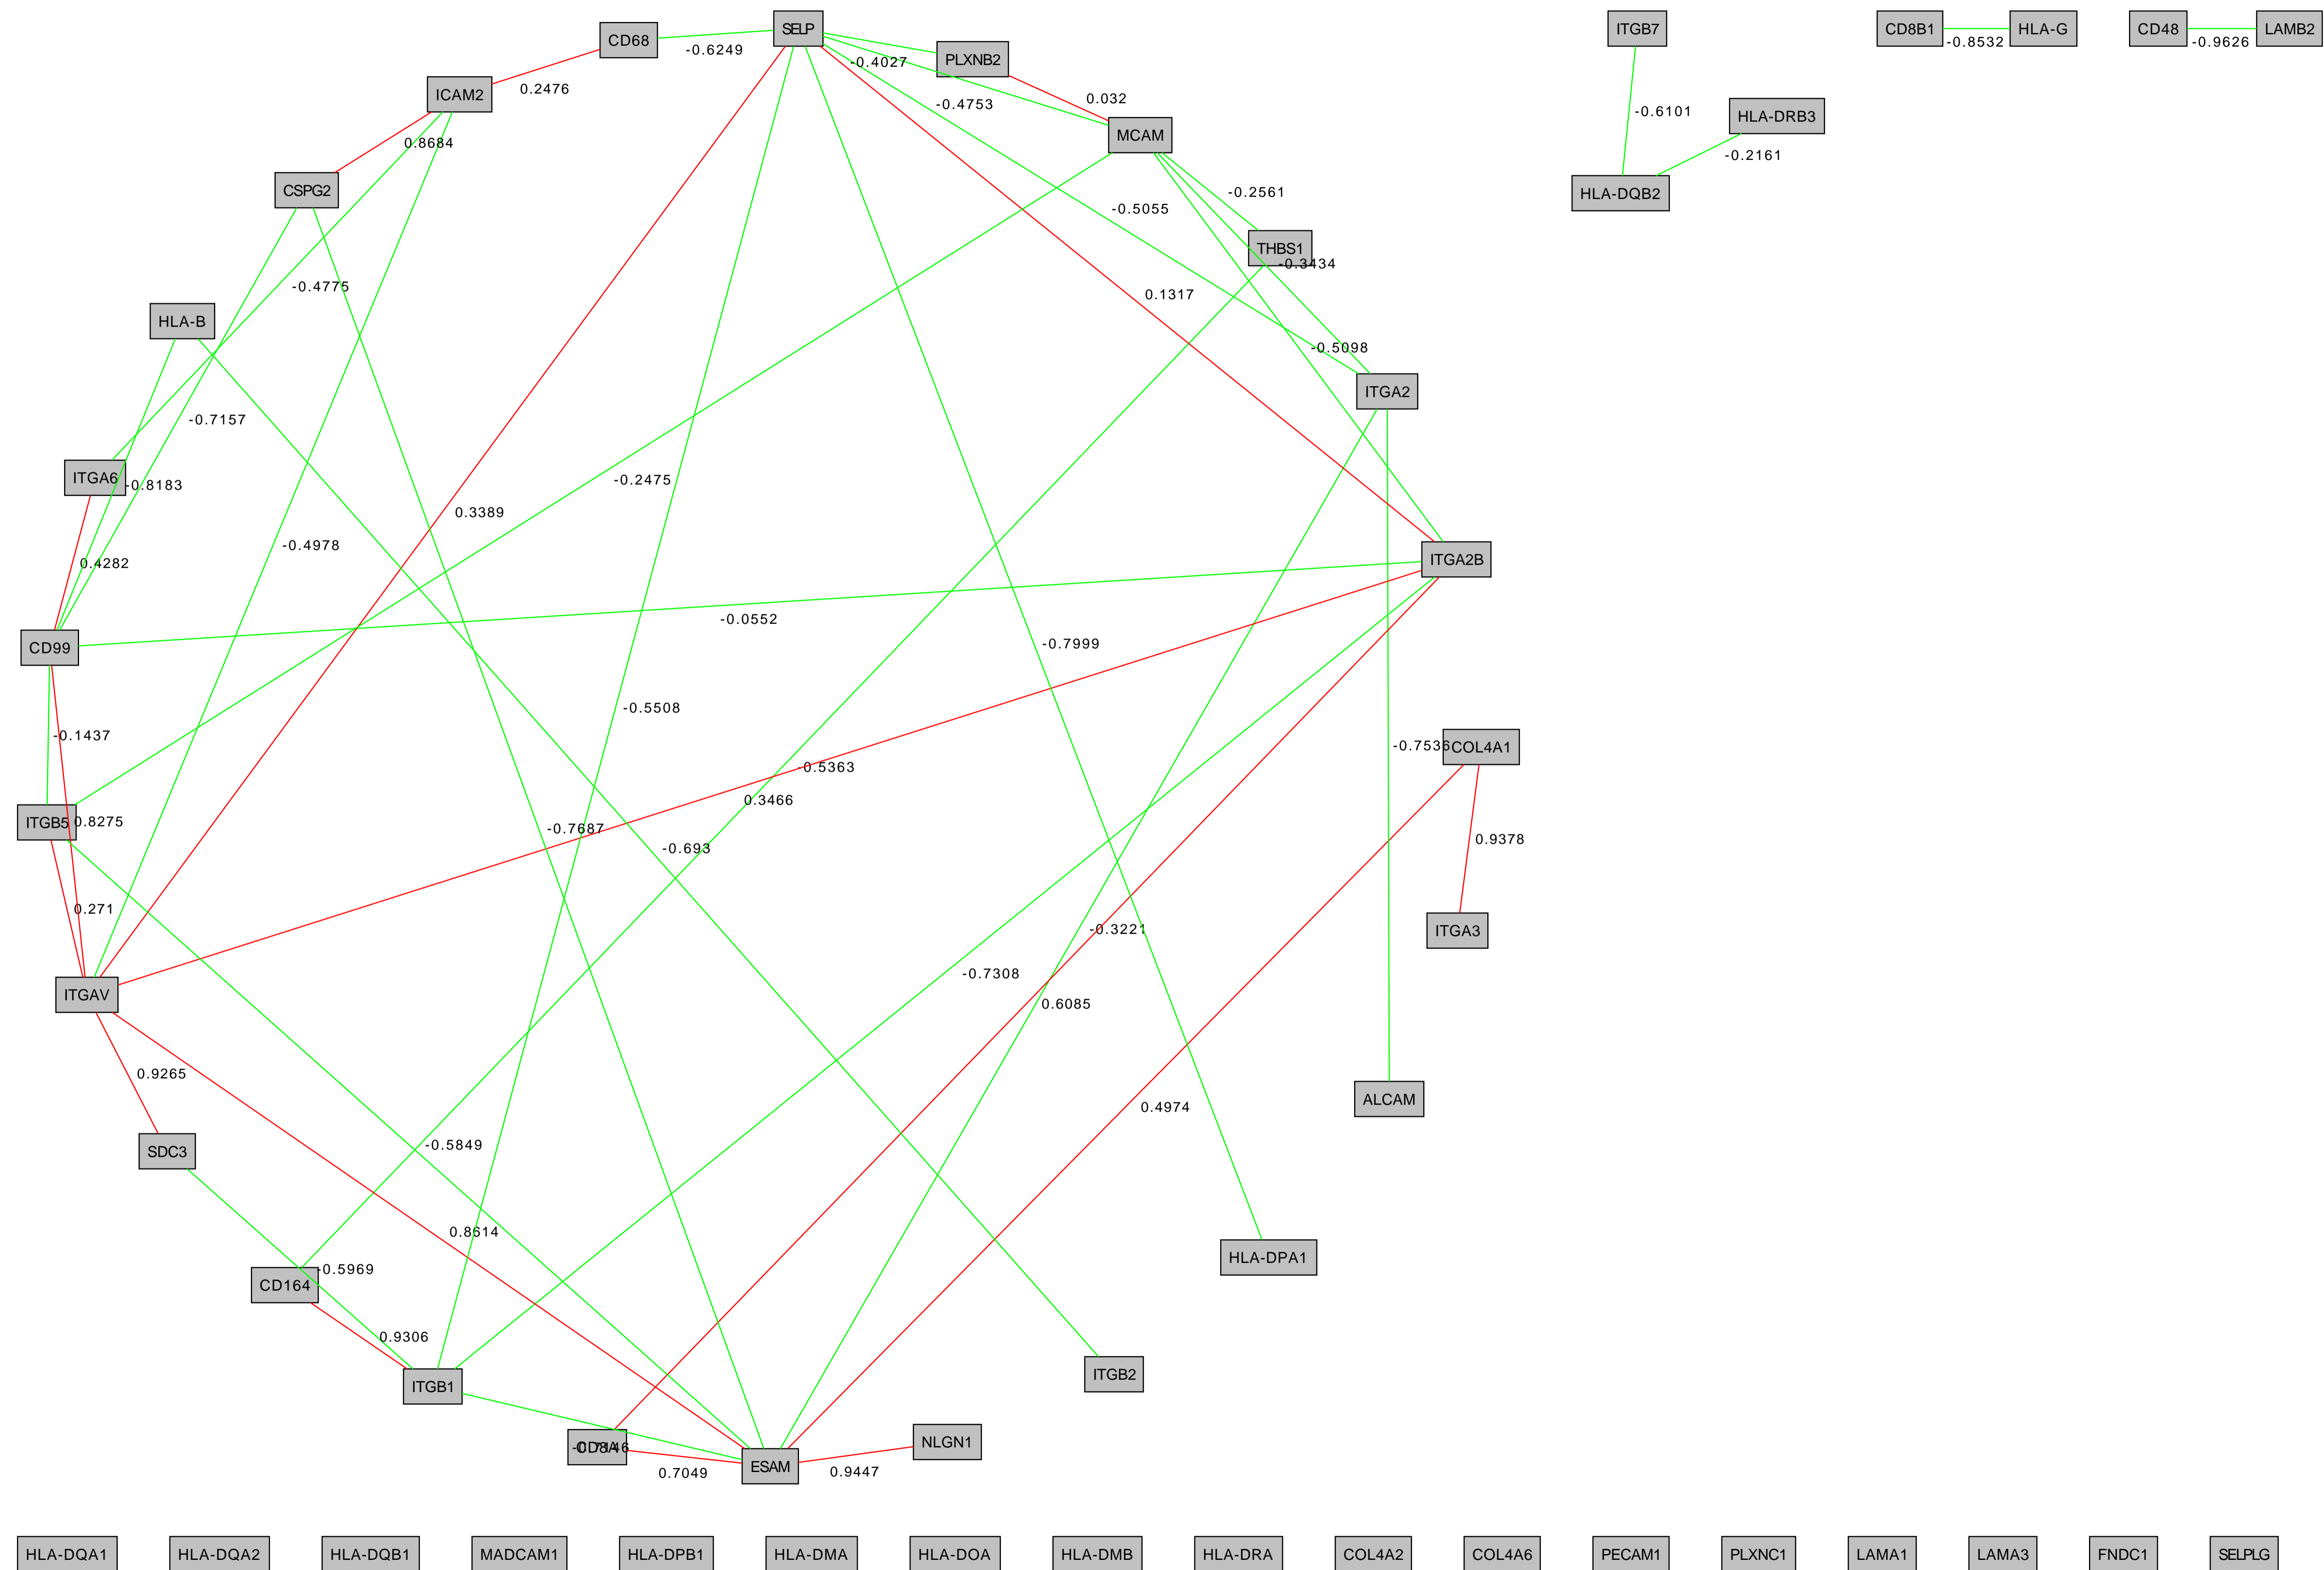

- HLA-DQA1 HLA-DQA2 HLA-DQB1 MADCAM1 HLA-DPB1 HLA-DMA HLA-DOA HLA-DMB HLA-DRA COL4A2 COL4A6 PECAM1 PLXNC1 LAMA1 LAMA3 FNDC1 SELPLG
- HLA-A HLA-C ICAM1 ICAM3 HLA-E HLA-F PTPRC ITGA5 ITGAL ITGAE CDH5 DAG1 CD44 CD47 THY1 GLG1 SELL CD2

ECM receptors + CAMs Days 1 up to 3

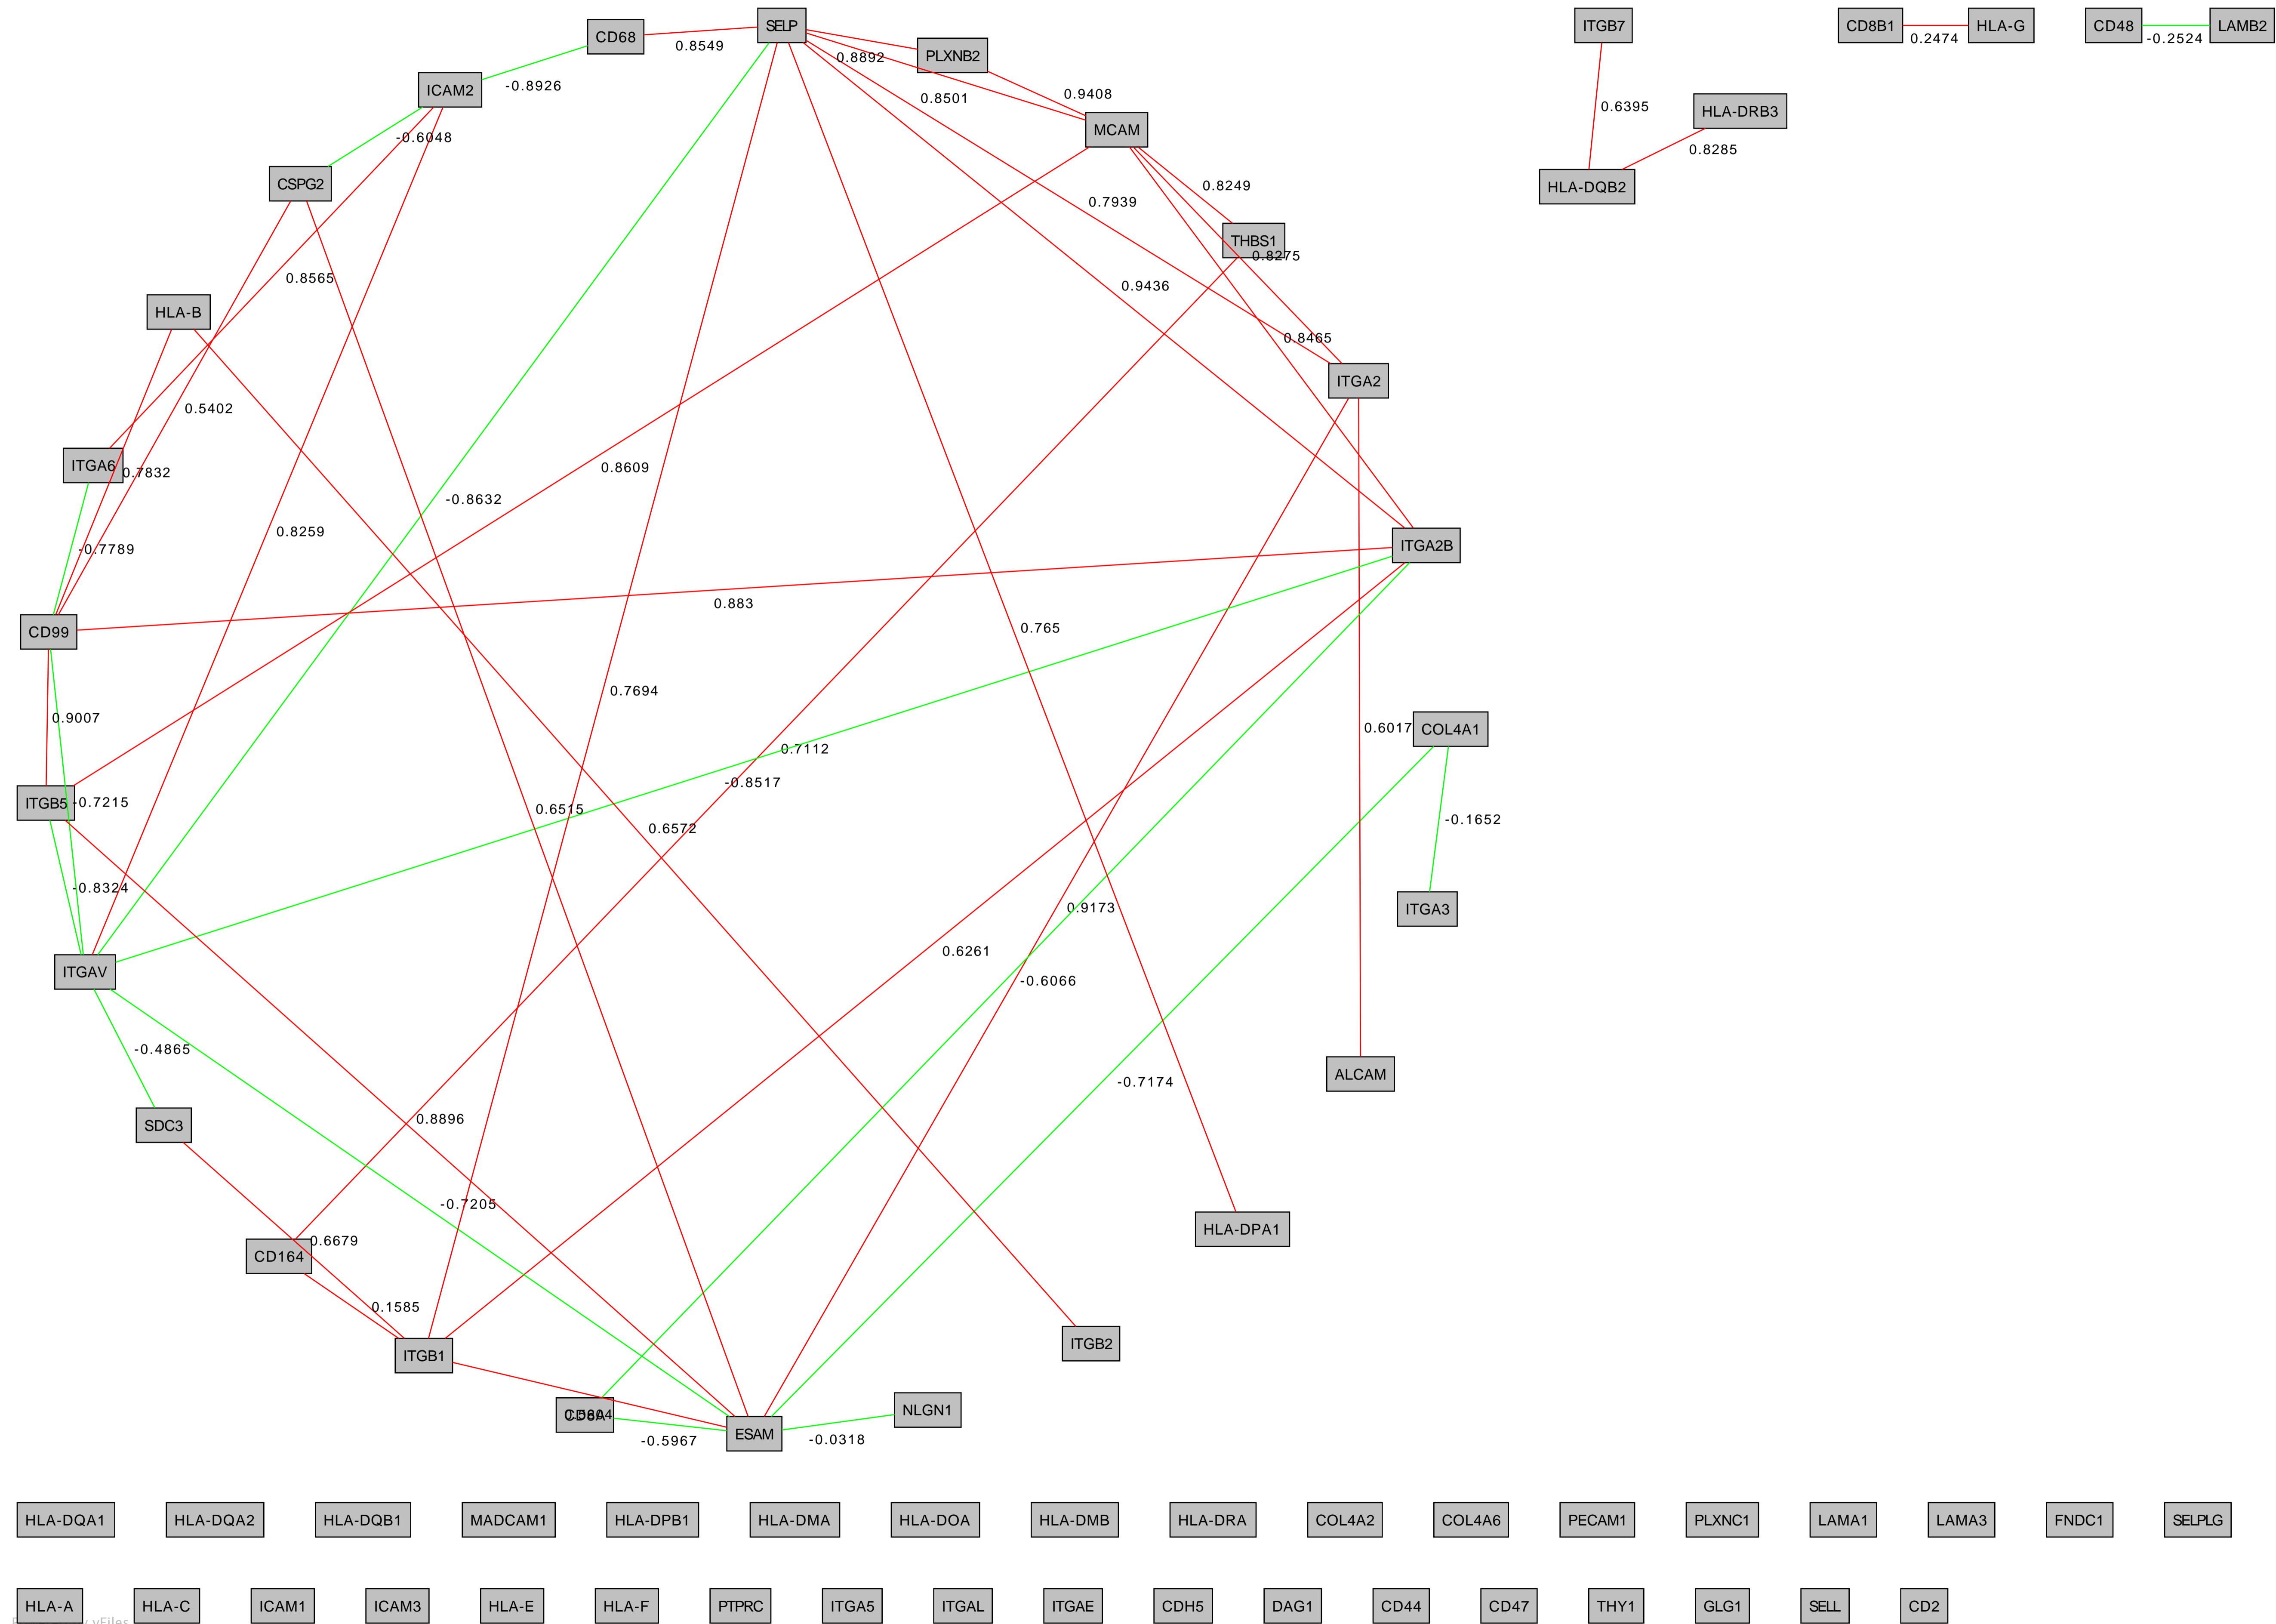

ECM receptors + CAMs P-values

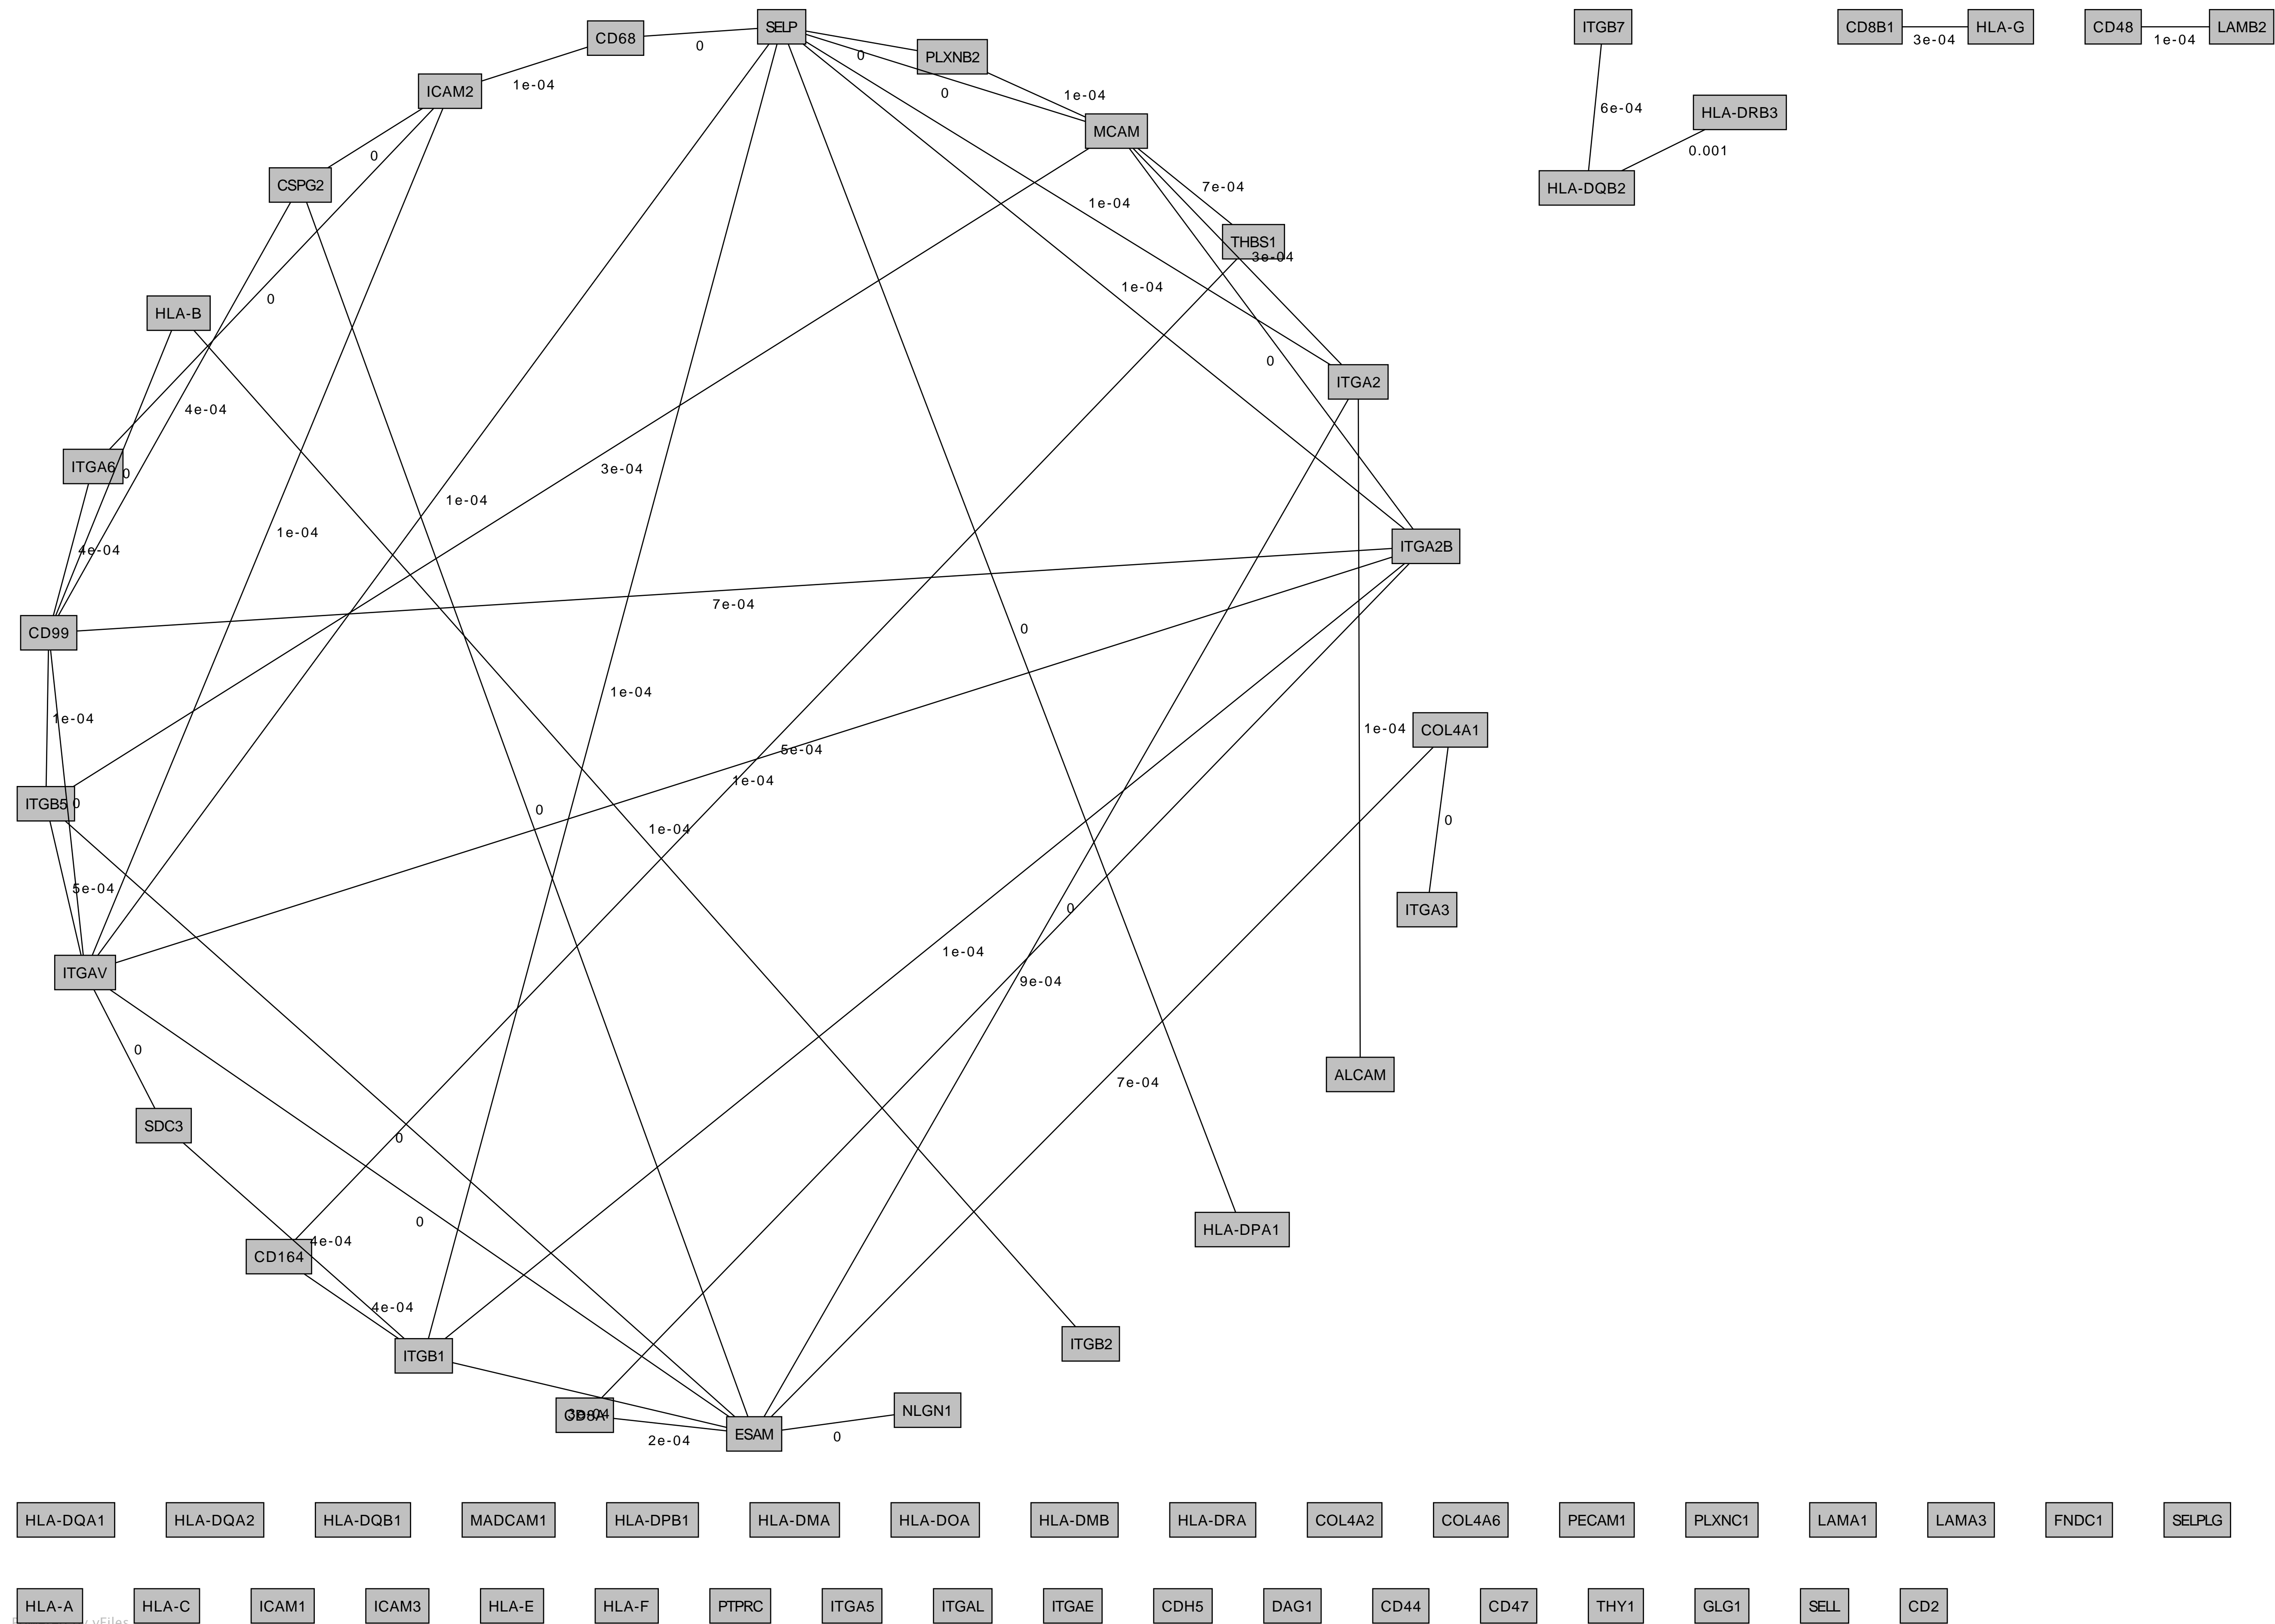

**Additional file 3:** Relevance networks for module ECM receptors + CAMs.

Edges from the graphs in first page (day 0) and second page (days 1-3) represent significant ( $p < 10^{-3}$ ) negative (green) or positive (red) correlation values.

In the last graph (third page), instead of correlation, the edges represent the p-values of the significantly changes of the correlations.
