# Supplementary material for: New insights about host response to smallpox using microarray data
Source: PubMed Central journal article supplement (PMC2077868; doi:10.1186/1752-0509-1-38), 2007-08-24
Supplement: 1752-0509-1-38-S5.pdf [file 1752-0509-1-38-S5.pdf]

# Cytokines Day 0

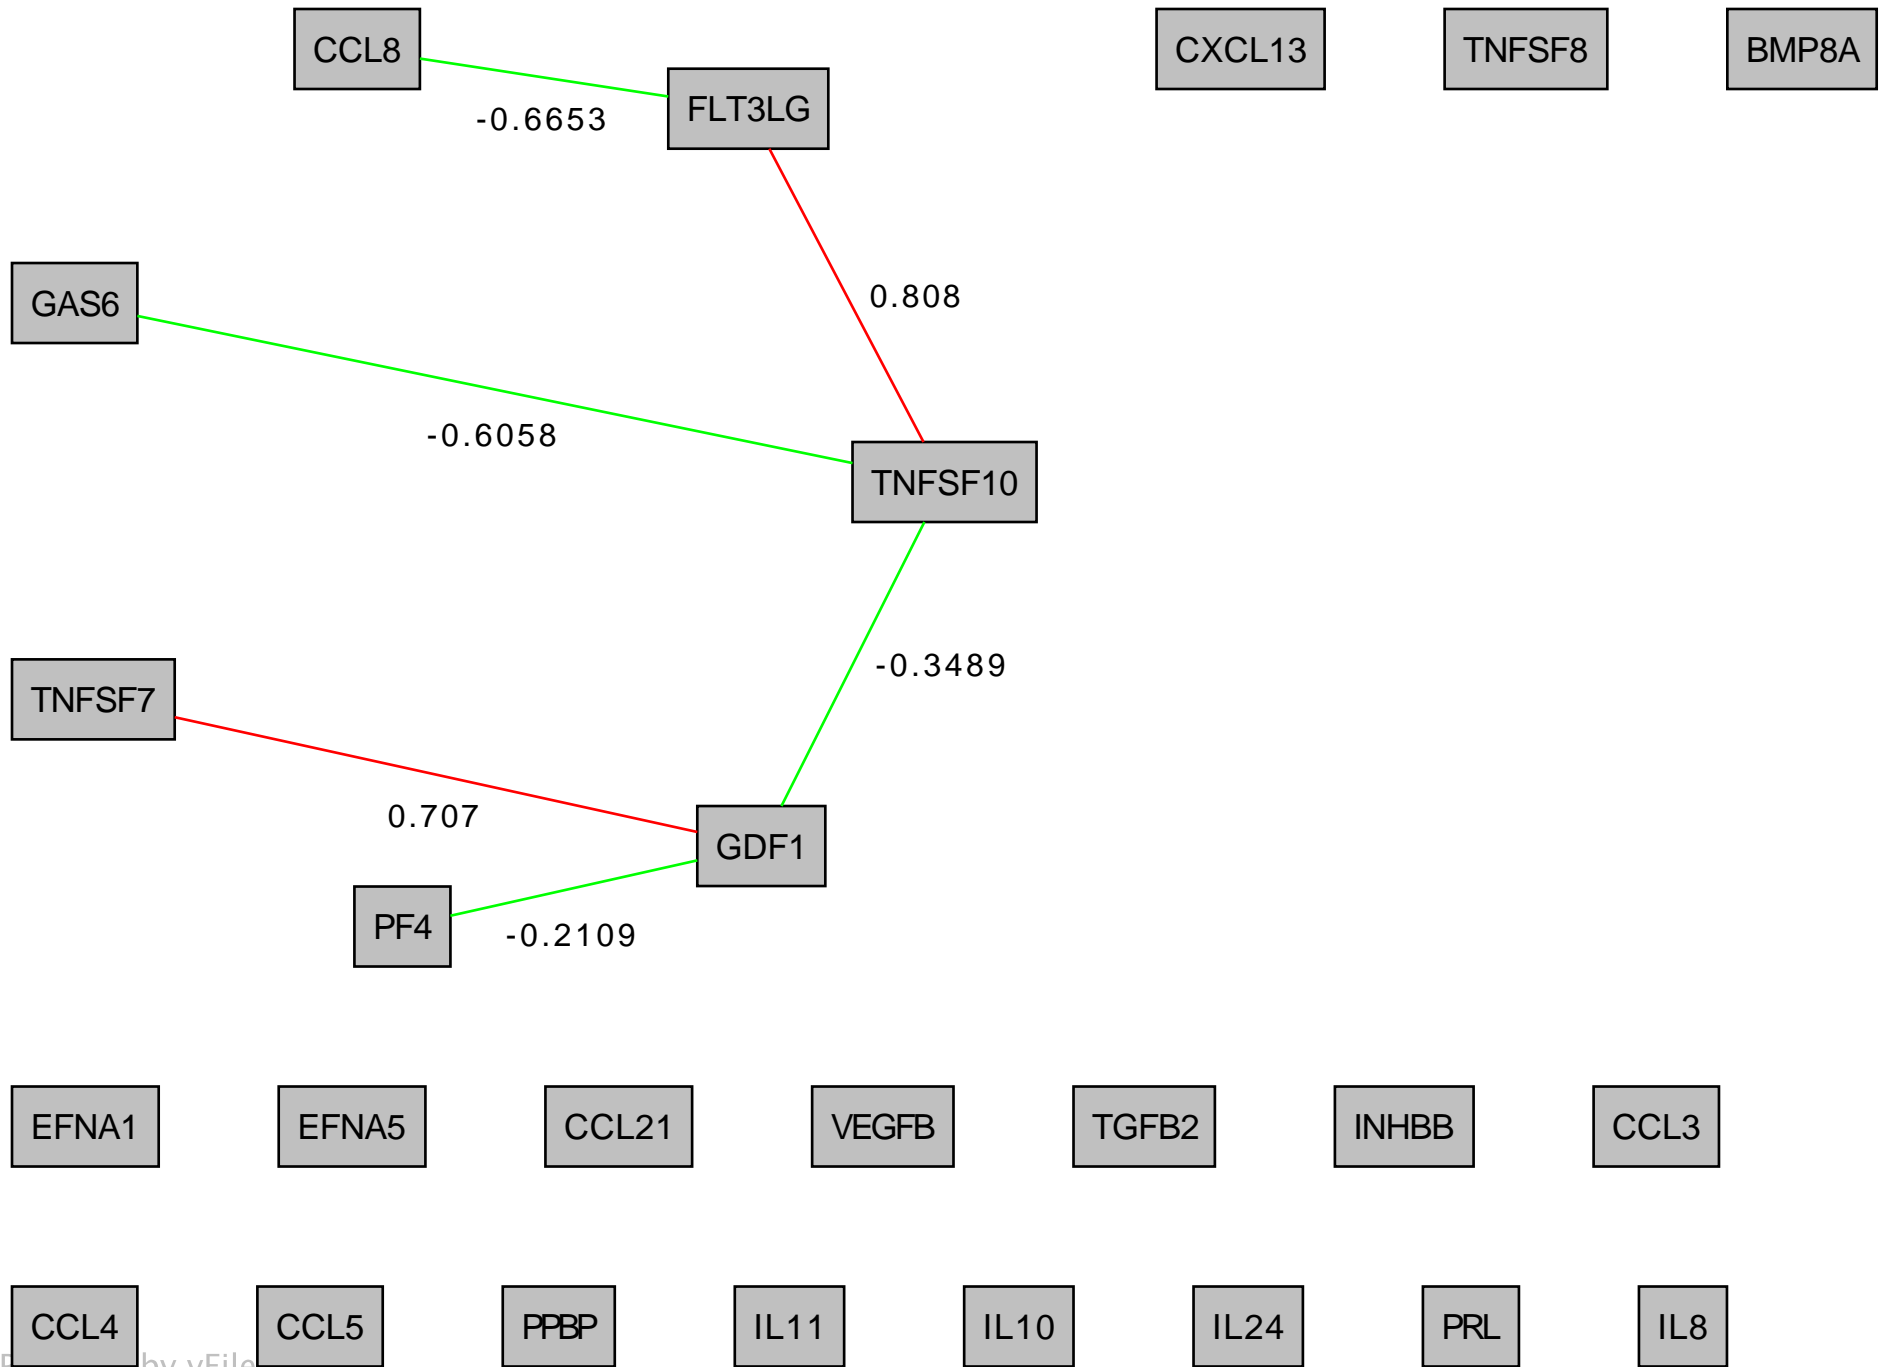

# Cytokines Days 1 up to 3

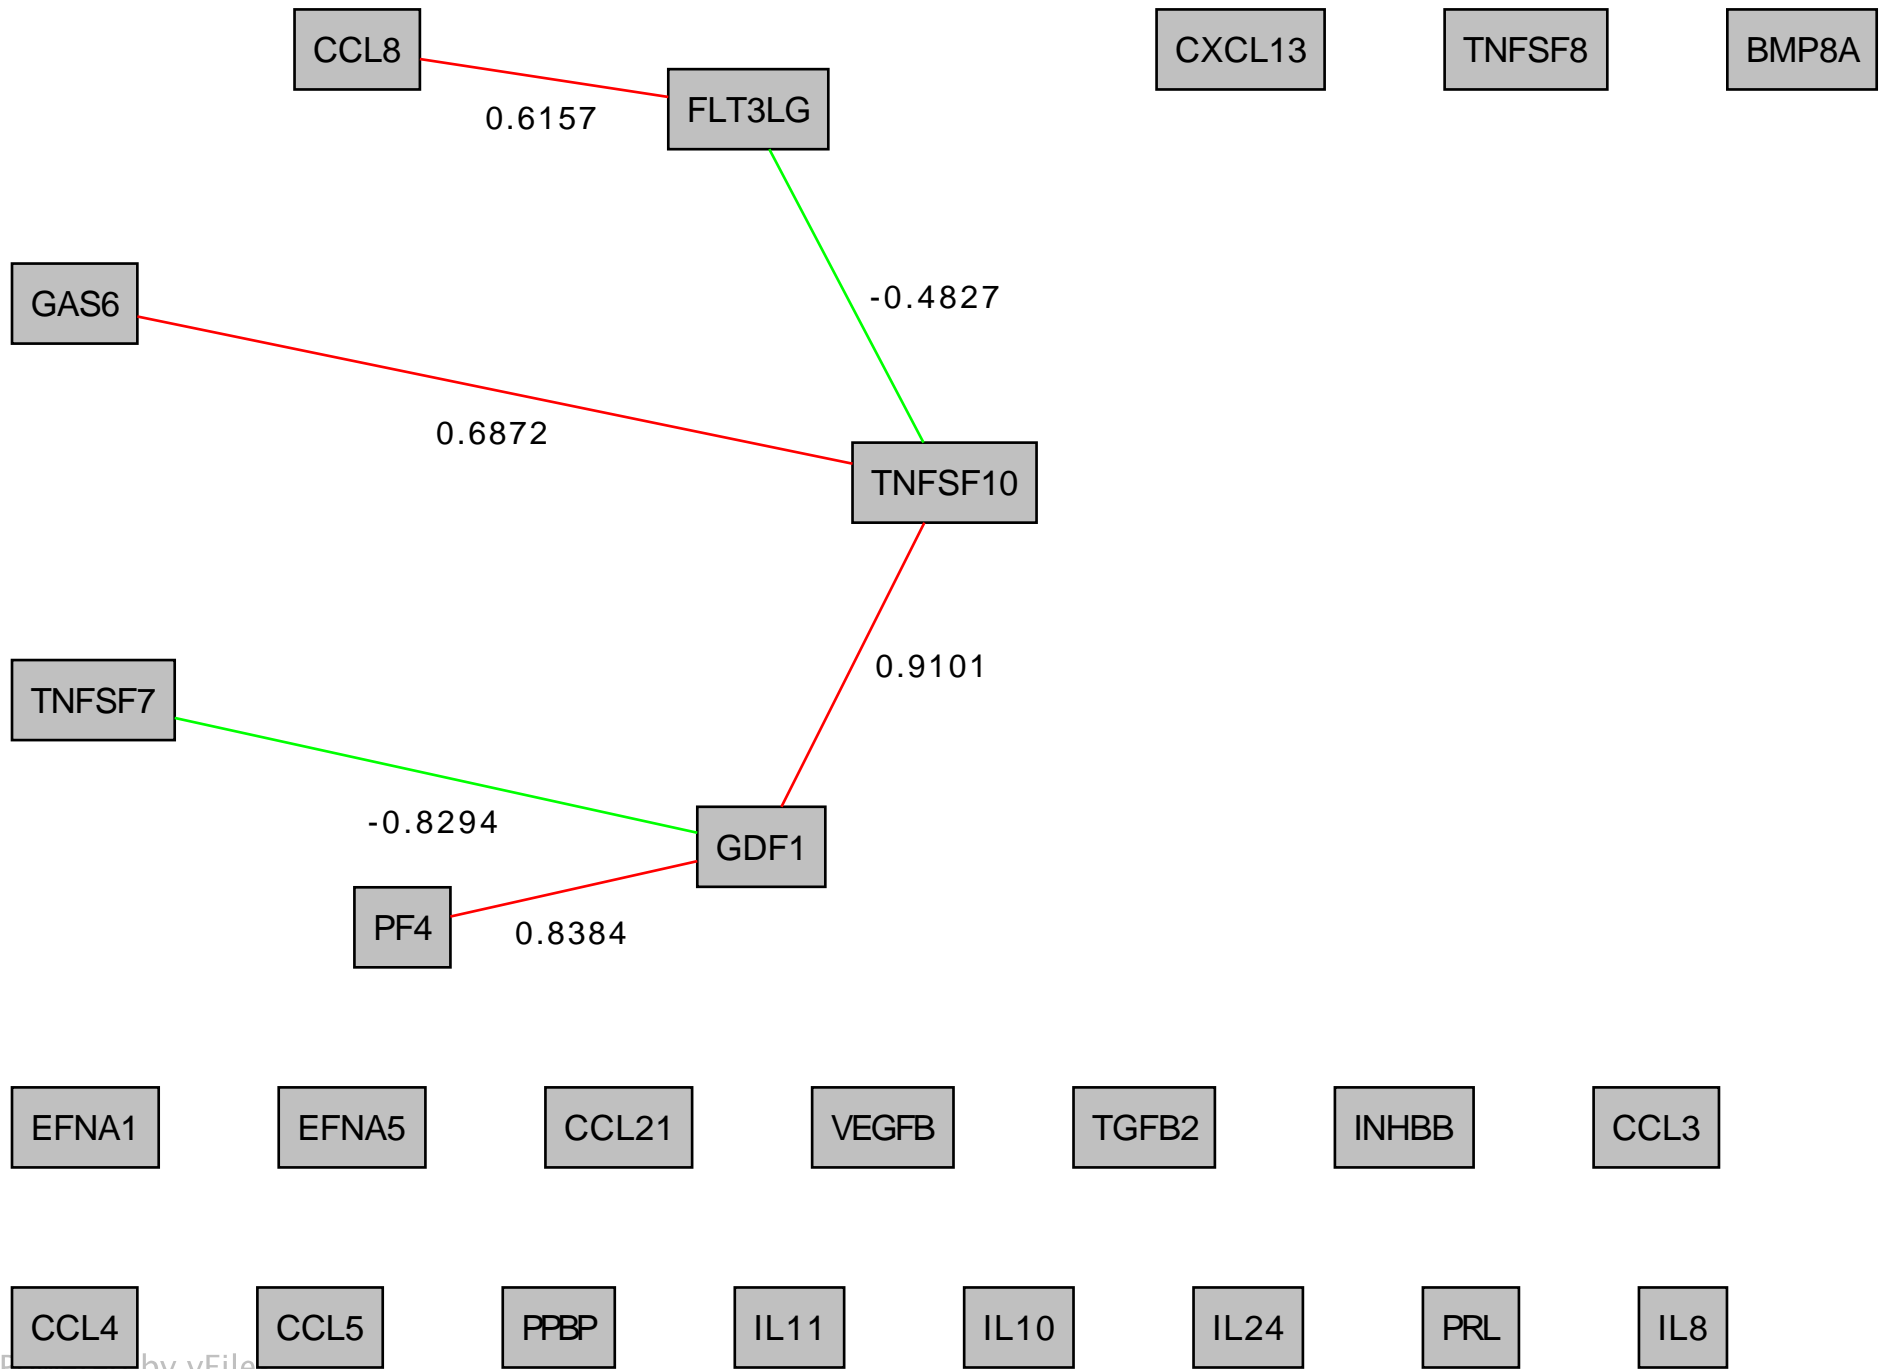

# Cytokines P-values

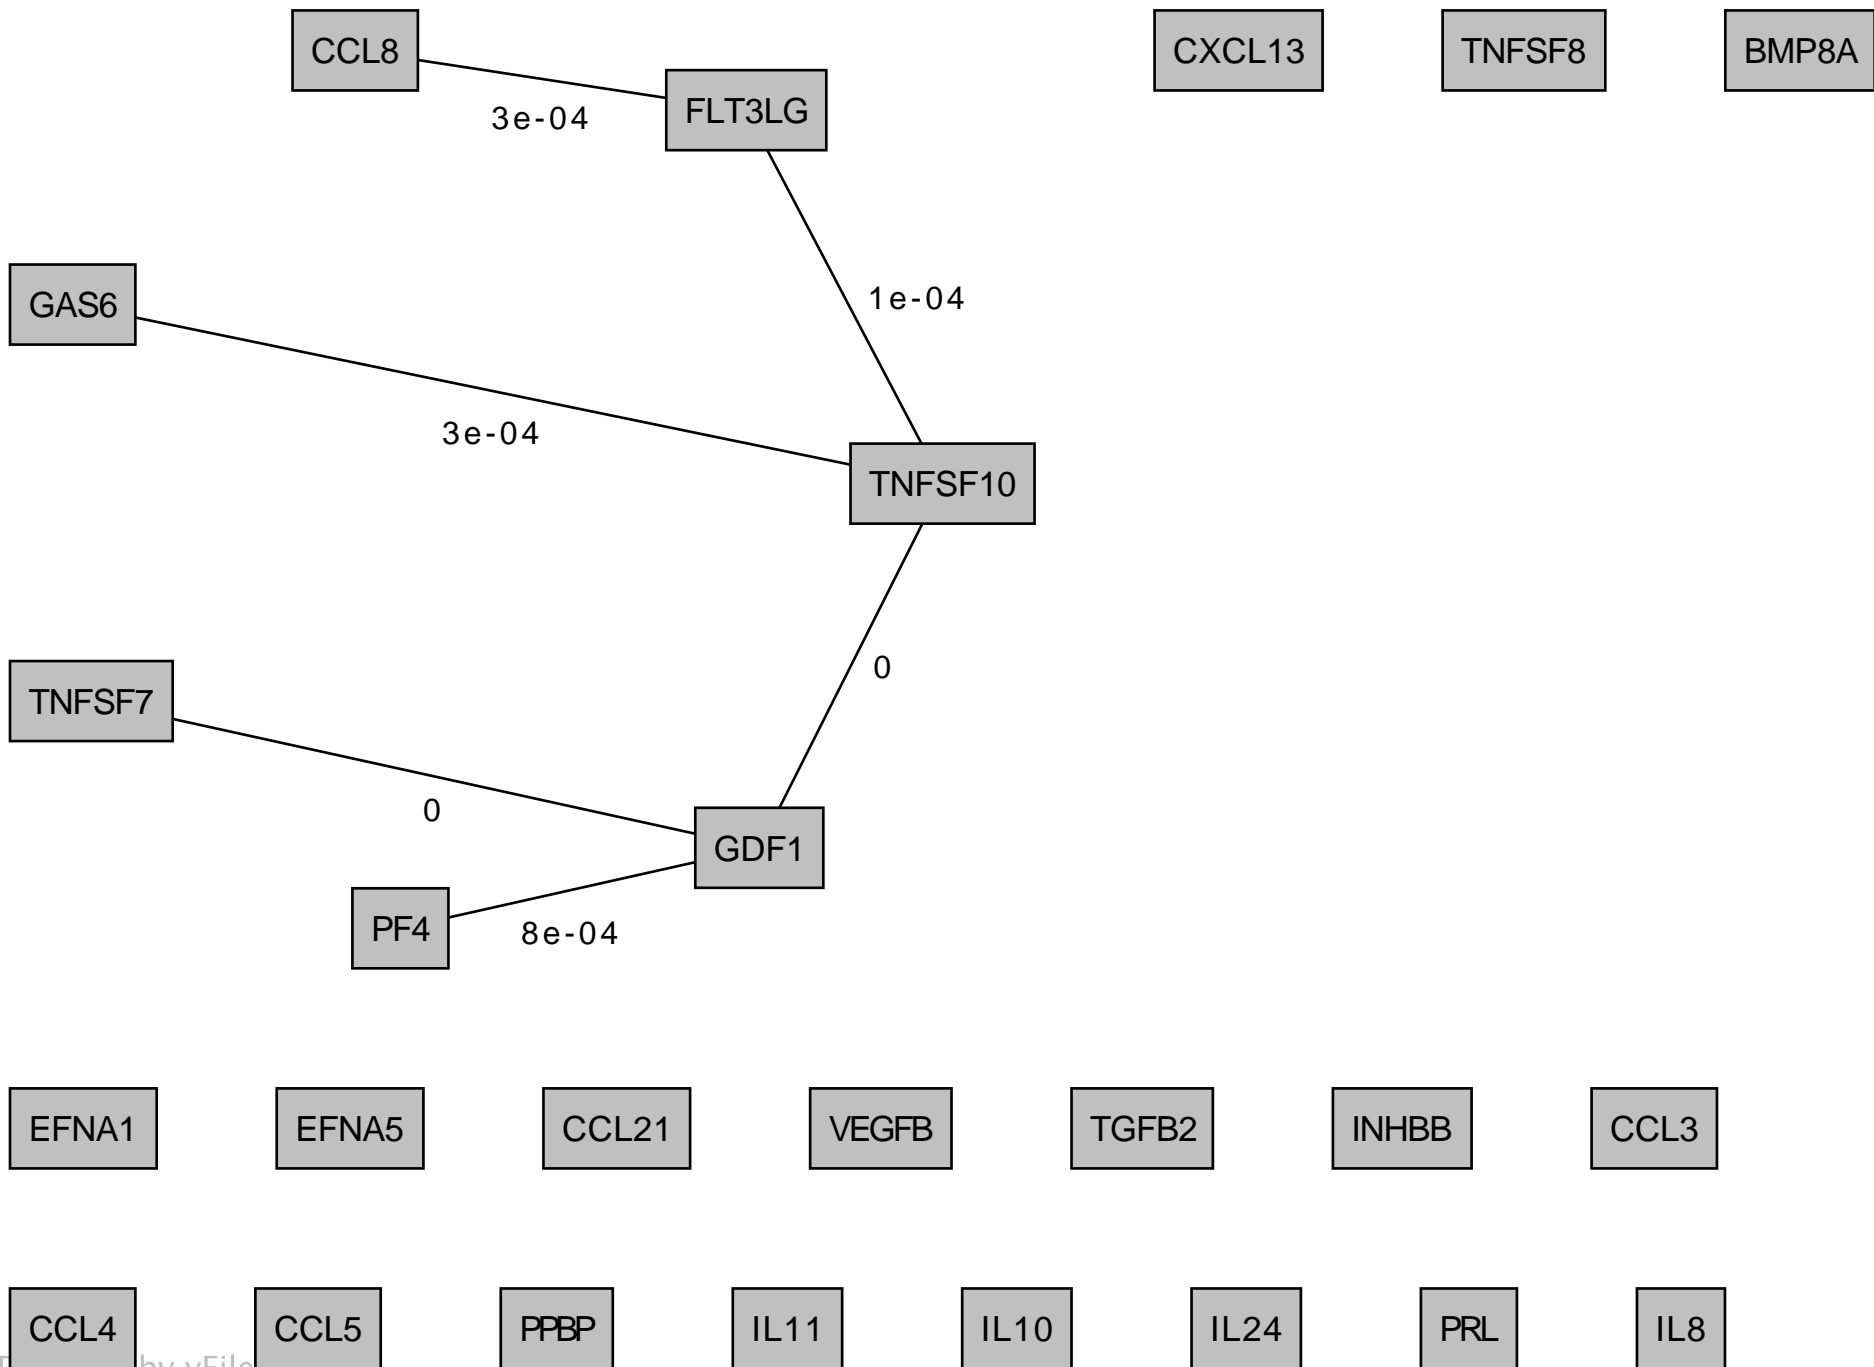

**Additional file 5:** Relevance networks for module Cytokines.

Edges from the graphs in first page (day 0) and second page (days 1-3) represent significant ( $p < 10^{-3}$ ) negative (green) or positive (red) correlation values.

In the last graph (third page), instead of correlation, the edges represent the p-values of the significantly changes of the correlations.

For this module the comparison of day 0 vs days 4-6 has no statistically significant results.
